# Supplementary material
Source: PubMed Central journal article supplement (PMC3112301)
Supplement: NIHMS272080-supplement-1_si_001.pdf [file NIHMS272080-supplement-1_si_001.pdf]

## Supplementary Information

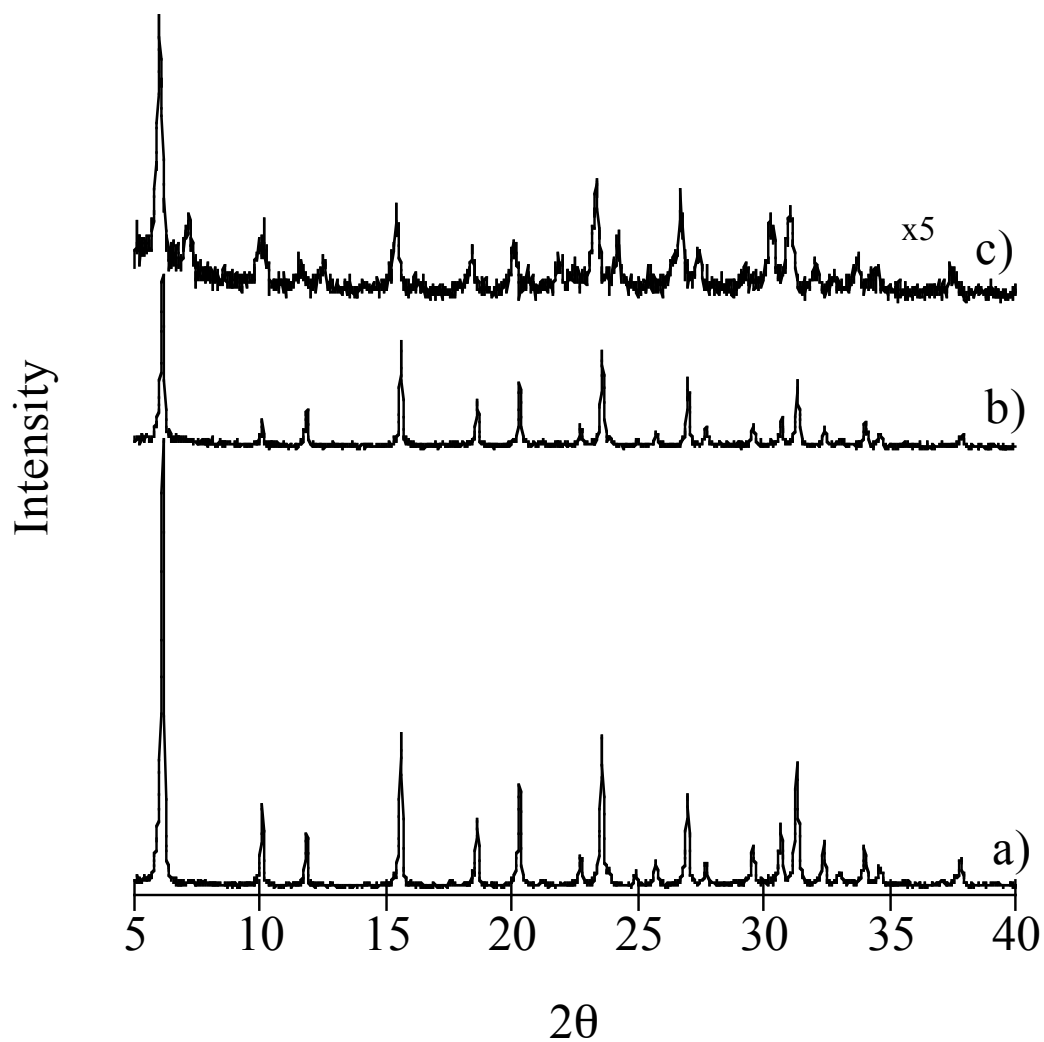

**Figure S1.** Powder X-ray diffraction pattern of a) NaY (Zeolyst) and b) NaY(Zeolyst) clicked with 4-Pentynol then Ga exchanged and c) nanocrystalline NaY. Impurity zeolite A is observed at  $2\theta=7.2^\circ$  for the in-house synthesized NaY-nano.

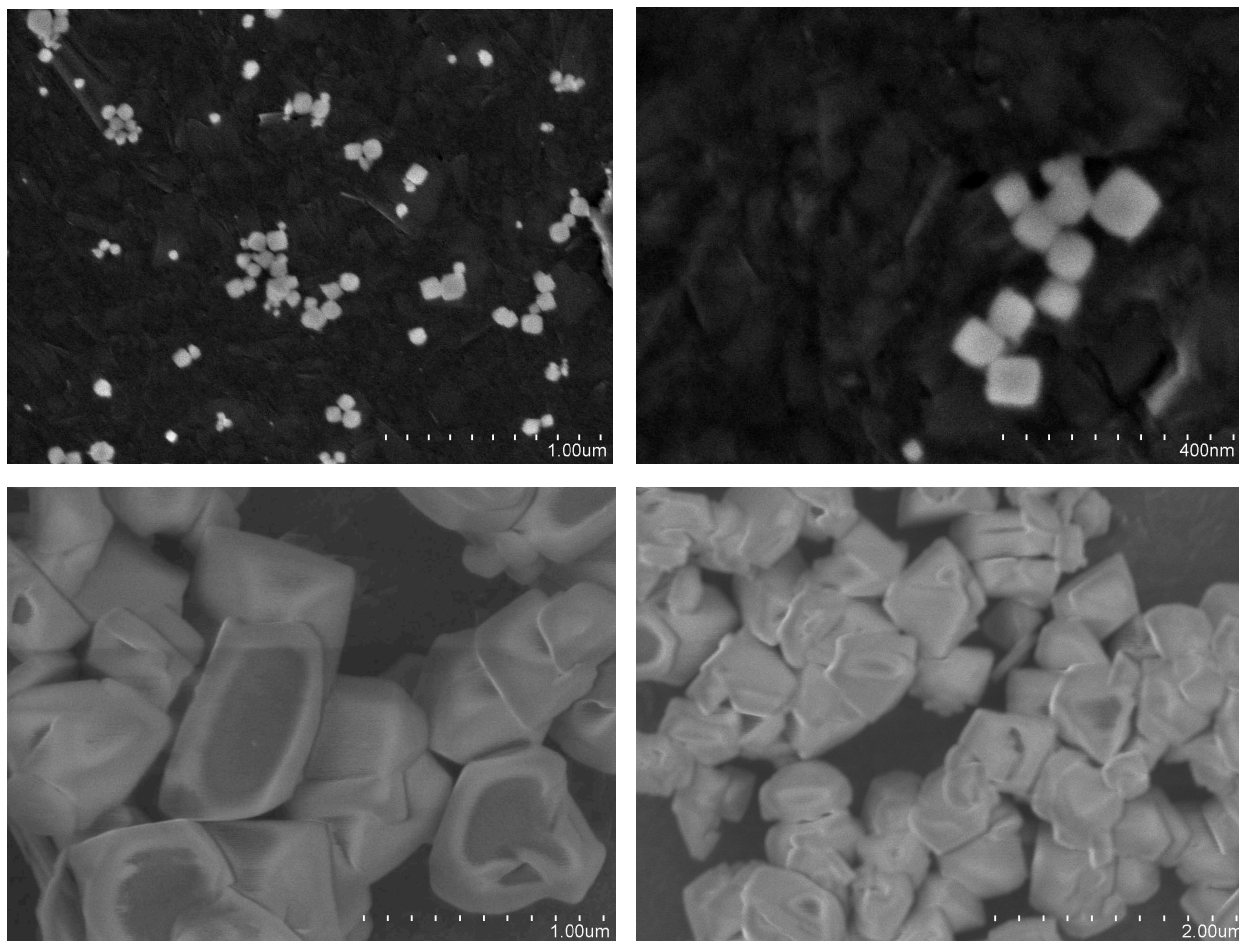

**Figure S2.** SEM images of nanocrystalline NaY (top) and NaY (Zeolyst) (bottom).
